# Supplementary material
Source: publisher figshare collection journal article supplement (https://frontiersin.figshare.com/ndownloader/files/34642799)
Supplement: Supplementary file [file 34642799]

## OBI K-19

### INFORMED CONSENT LETTER

In accordance with the provisions contained in the General Health Law, Fifth Title "Health Research", Sole Chapter, article 100, section IV; as well as the Regulation of the General Health Law on Research for Health, Second Title "Of the Ethical Aspects of Research in Human Beings" Chapter I, Common Provisions, Article 13 which states that in all research in which the human being is the subject of study, the criteria of respect for their dignity and the protection of their rights and well-being must prevail, articles 14 section V, 20, 21 and 22 of this Regulation; and, in accordance with the ethical principles contained in the Declaration of Helsinki, it has been explained to me and informed that:

- I. It has been explained to me that I possibly suffer from the SARS-CoV-2 (COVID-19) viral infection and that I am proposed to participate in the research initiative to test the detection of this virus using body fluids as a possible alternative to detection by RT -PCR.
- II. I have been informed that 5 sweat samples, 5 saliva samples and 1 urine sample of 60 ml will be taken, this is in addition to the study that requires the RT-PCR test. In addition, personal data related to my age, diet, use of medications, etc. will be obtained from me.
- III. The results of this study will help to better determine the presence of SARS-CoV-2 (COVID-19) in my case and in other patients.
- IV. I have been assured that I can ask questions about the study and my participation to the best of my satisfaction
- V. I authorize the publication of the results of my study on the condition that professional secrecy will be maintained at all times and that my name will not be published or my identity will be revealed.
- VI. The researchers are committed to providing me with up-to-date information obtained during the study, although this may contradict the results obtained in the RT-PCR test.
- VII. Laboratory studies (RT-PCR) and detection using dogs will be covered by the Anticipa Center and the Research Project "OBI: canines against COVID"

With date \_\_\_\_\_, having understood the above and once all the doubts regarding my participation in the project have been clarified I : \_\_\_\_\_  
\_\_\_\_\_ with patient number \_\_\_\_\_ agree to participate in the  
study entitled : "OBI: Caninos contra COVID".

Patient's name and signature \_\_\_\_\_

Name and signature of witness \_\_\_\_\_

## MEDICAL AND CONSUMPTION HISTORY

PLEASE FILL AND MARK AS NECESSARY

| Medical condition                                    | Yes | No |
|------------------------------------------------------|-----|----|
| Cancer                                               |     |    |
| Hypertension                                         |     |    |
| Diabetes                                             |     |    |
| Respiratory conditions (Asthma , tuberculosis, etc.) |     |    |
| Epilepsy                                             |     |    |
| Alcohol last 24 hr                                   |     |    |
| Recreational drugs or CBD last 24 hr                 |     |    |

Other: \_\_\_\_\_

### CONSUMPTION

| Consumption             | Daily or more than 3 times per week | Occasionally | None | Last 24 hr |
|-------------------------|-------------------------------------|--------------|------|------------|
| Alcohol                 |                                     |              |      |            |
| Smoking                 |                                     |              |      |            |
| Recreative drugs or CBD |                                     |              |      |            |

### SYMPTOMS:

| Diarrhea | Fever | Dry cough | Nausea | Loss of taste | Loss of smell | Headache | Throat pain | Chest pain | Body pain | Fatigue | Runny nose |
|----------|-------|-----------|--------|---------------|---------------|----------|-------------|------------|-----------|---------|------------|
|          |       |           |        |               |               |          |             |            |           |         |            |

### Symptoms and prescriptions

|                         |      |
|-------------------------|------|
| Days with symptoms      | Days |
| Days with prescriptions | Days |

Menstrual period      Yes      No

Gender: Female/Male

Age:

Thank you very much for your help
